# Supplementary material for: Design, Intervention Fidelity, and Behavioral Outcomes of a School-Based Water, Sanitation, and Hygiene Cluster-Randomized Trial in Laos
Source: Int J Environ Res Public Health. 2018 Mar 22;15(4):570. doi: 10.3390/ijerph15040570 (PMC5923612; doi:10.3390/ijerph15040570)
Supplement: Supplementary file 1 [file ijerph-15-00570-s001.pdf]

**Table S1.** Key school-level indicators by intervention status at baseline

|                                                 | <b>Intervention</b><br>(n=50) | <b>Comparison</b><br>(n=50) | <b>p</b> |
|-------------------------------------------------|-------------------------------|-----------------------------|----------|
| Mean (SD) total number of enrolled students     | 72.0 (8.3)                    | 67.8 (7.8)                  | 0.71     |
| Mean (SD) total number of girls enrolled        | 33.9 (3.6)                    | 32.2 (3.6)                  | 0.74     |
| Mean (SD) total number of boys enrolled         | 38.1 (4.8)                    | 35.5 (4.4)                  | 0.70     |
| Gender parity (boys/girls)                      | 1.12 (0.04)                   | 1.11 (0.4)                  | 0.49     |
| Pupil absent on day of roll-call <sup>1</sup>   | 761 (21.2%)                   | 564 (16.7%)                 | 0.72     |
| Presence of latrine at school                   | 9 (18.0%)                     | 11 (22.0%)                  | 0.62     |
| Water point on school compound                  | 7 (29.2%)                     | 4 (16.7%)                   | 0.30     |
| Presence of handwashing facilities at school    | 0 (0%)                        | 0 (0%)                      | --       |
| Complete school (vs. incomplete)                | 21 (42.0%)                    | 15 (30.0%)                  | 0.21     |
| Mean (SD) amount of School Block Grant (in USD) | \$320 (\$226)                 | \$234 (\$158)               | 0.05     |

<sup>1</sup>n=3,598 in intervention group; n=3,388 in comparison group

**Table S2.** Key pupil-level indicators by intervention status at baseline

|                                                 | <b>Intervention n(%)</b><br>1,120 (51.5%) | <b>Comparison n(%)</b><br>1,056 (48.5%) | <b>p</b> |
|-------------------------------------------------|-------------------------------------------|-----------------------------------------|----------|
| Mean (SD) pupil age <sup>1</sup>                | 10.4 (2.0)                                | 10.5 (1.9)                              | 0.61     |
| Mean (SD) pupil grade                           | 3.8 (0.8)                                 | 3.7 (0.8)                               | 0.43     |
| Gender: Girl                                    | 547 (48.8%)                               | 520 (49.2%)                             | 0.92     |
| Improved water source used at home              | 773 (69.1%)                               | 600 (56.8%)                             | 0.78     |
| Toilet at home                                  | 198 (17.7%)                               | 269 (25.5%)                             | 0.71     |
| Presence of handwashing facility at home        | 470 (42.0%)                               | 451 (42.7%)                             | 0.46     |
| Above median household wealth (ref: below)      | 500 (45.6%)                               | 559 (53.5%)                             | 0.94     |
| Absence in previous week                        | 193 (17.3%)                               | 173 (16.4%)                             | 0.84     |
| Diarrhea in previous week                       | 90 (8.1%)                                 | 88 (8.3%)                               | 0.70     |
| Respiratory infection symptoms in previous week | 318 (28.4%)                               | 303 (28.7%)                             | 0.58     |
| STH infection <sup>2</sup>                      | 780 (41.2%)                               | 721 (40.9%)                             | 0.95     |

<sup>1</sup>Age unknown for 218 pupils (Intervention=107, Comparison=111)

<sup>2</sup>n=1,894 in intervention group; n=1,765 in comparison group

**Table S3.** Beta coefficients ( $\beta$ ) and 95% confidence intervals (CI) of the associations between school toilet output criteria and percentage of pupils reported toilet use for last defecation during the school day

| <b>Criteria</b>                                                                 | <b>At least 1 toilet meeting criteria</b> |                     | <b>Per toilet meeting criteria</b> |                    |
|---------------------------------------------------------------------------------|-------------------------------------------|---------------------|------------------------------------|--------------------|
|                                                                                 | <b><math>\beta</math></b>                 | <b>95% CI</b>       | <b><math>\beta</math></b>          | <b>95% CI</b>      |
| Toilet output (unlocked, gender separated, water available for flushing, clean) | <i>20.1</i>                               | <i>(14.0, 26.2)</i> | <i>6.4</i>                         | <i>(4.2, 8.6)</i>  |
| Unlocked                                                                        | <i>35.4</i>                               | <i>(28.4, 42.4)</i> | <i>12.0</i>                        | <i>(9.7, 14.4)</i> |
| Gender separated                                                                | <i>7.5</i>                                | <i>(-1.8, 16.7)</i> | <i>1.3</i>                         | <i>(-1.8, 4.3)</i> |
| Water for flushing                                                              | <i>13.0</i>                               | <i>(5.7, 20.3)</i>  | <i>2.9</i>                         | <i>(0.1, 5.8)</i>  |
| Clean                                                                           | <i>25.6</i>                               | <i>(14.0, 37.1)</i> | <i>1.2</i>                         | <i>(-3.1, 5.5)</i> |

***Bold italics*** indicate statistical significance at  $p < 0.05$
